# Supplementary material for: Unique properties of a subset of human pluripotent stem cells with high capacity for self-renewal
Source: PubMed Central journal article supplement (PMC7229198; doi:10.1038/s41467-020-16214-8), 2020-05-15
Supplement: 41467_2020_16214_MOESM4_ESM.pdf [file 41467_2020_16214_MOESM4_ESM.pdf]

## **Description of Additional Supplementary Files**

Supplementary Movie 1:

Fate of aggregates of GCTM-2<sup>high</sup>CD9<sup>high</sup> cells for 1-24 hours post-plating

Supplementary Movie 2:

Fate of aggregates of GCTM-2<sup>mid</sup>CD9<sup>mid</sup> cells for 1-24 hours post-plating.

Supplementary Data 1.

Differential chromatin accessible peaks between populations.

Supplementary Data 2.

Results from locus overlap enrichment analysis (LOLA) for chromatin accessible peaks from GCTM-2<sup>high</sup>CD9<sup>high</sup>EPCAM<sup>high</sup> and GCTM-2<sup>mid</sup>CD9<sup>mid</sup> populations.

Supplementary Data 3.

RNA-seq analysis of differential gene expression in GCTM-2<sup>high</sup>CD9<sup>high</sup>EPCAM<sup>high</sup> subpopulation and unsorted cells (general population).
